# Supplementary material for: Developmental characteristics of pearl oyster Pinctada fucata martensii: insight into key molecular events related to shell formation, settlement and metamorphosis
Source: BMC Genomics. 2019 Feb 8;20:122. doi: 10.1186/s12864-019-5505-8 (PMC6368781; doi:10.1186/s12864-019-5505-8)
Supplement: Supplementary file 2 — Gene Ontology enrichment of differentially expressed genes in P. f. martensii (XLSX 22 kb) [file 12864_2019_5505_MOESM2_ESM.xlsx]

## Sheet: Sheet1
Additional file 2. Gene Ontology enrichment of differentially expressed genes in P. f. martensii
Gene Ontology term	Cluster frequency	Genome frequency of use	Corrected P-value	classification	group
dynein complex	21 out of 2378 genes, 0.9%	23 out of 6527 genes, 0.4%	1.13e-05	component	ET VS T
cytoskeletal part	65 out of 2378 genes, 2.7%	105 out of 6527 genes, 1.6%	1.45e-05	component	ET VS T
protein complex	204 out of 2378 genes, 8.6%	427 out of 6527 genes, 6.5%	8.09e-05	component	ET VS T
cytoskeleton	91 out of 2378 genes, 3.8%	167 out of 6527 genes, 2.6%	0.0002	component	ET VS T
microtubule associated complex	24 out of 2378 genes, 1.0%	30 out of 6527 genes, 0.5%	0.00022	component	ET VS T
external encapsulating structure	27 out of 2378 genes, 1.1%	36 out of 6527 genes, 0.6%	0.00047	component	ET VS T
outer membrane-bounded periplasmic space	26 out of 2378 genes, 1.1%	35 out of 6527 genes, 0.5%	0.00098	component	ET VS T
cell envelope	26 out of 2378 genes, 1.1%	35 out of 6527 genes, 0.5%	0.00098	component	ET VS T
periplasmic space	26 out of 2378 genes, 1.1%	35 out of 6527 genes, 0.5%	0.00098	component	ET VS T
external encapsulating structure part	26 out of 2378 genes, 1.1%	35 out of 6527 genes, 0.5%	0.00098	component	ET VS T
organelle	434 out of 2378 genes, 18.3%	1021 out of 6527 genes, 15.6%	0.00138	component	ET VS T
intracellular organelle	434 out of 2378 genes, 18.3%	1021 out of 6527 genes, 15.6%	0.00138	component	ET VS T
microtubule cytoskeleton	45 out of 2378 genes, 1.9%	75 out of 6527 genes, 1.1%	0.00458	component	ET VS T
envelope	41 out of 2378 genes, 1.7%	67 out of 6527 genes, 1.0%	0.00541	component	ET VS T
organelle part	158 out of 2378 genes, 6.6%	338 out of 6527 genes, 5.2%	0.00751	component	ET VS T
intracellular organelle part	158 out of 2378 genes, 6.6%	338 out of 6527 genes, 5.2%	0.00751	component	ET VS T
membrane-bounded organelle	322 out of 2378 genes, 13.5%	749 out of 6527 genes, 11.5%	0.00902	component	ET VS T
intracellular membrane-bounded organelle	322 out of 2378 genes, 13.5%	749 out of 6527 genes, 11.5%	0.00902	component	ET VS T
nucleus	239 out of 2378 genes, 10.1%	543 out of 6527 genes, 8.3%	0.01593	component	ET VS T
macromolecular complex	247 out of 2378 genes, 10.4%	571 out of 6527 genes, 8.7%	0.04672	component	ET VS T
motor activity	46 out of 2416 genes, 1.9%	101 out of 13517 genes, 0.7%	5.46e-08	function	ET VS T
microtubule motor activity	36 out of 2416 genes, 1.5%	72 out of 13517 genes, 0.5%	2.28e-07	function	ET VS T
sequence-specific DNA binding	87 out of 2416 genes, 3.6%	300 out of 13517 genes, 2.2%	0.00055	function	ET VS T
nucleic acid binding transcription factor activity	102 out of 2416 genes, 4.2%	367 out of 13517 genes, 2.7%	0.00061	function	ET VS T
sequence-specific DNA binding transcription factor activity DNA	102 out of 2416 genes, 4.2%	367 out of 13517 genes, 2.7%	0.00061	function	ET VS T
phosphotransferase activity, alcohol group as acceptor	116 out of 2416 genes, 4.8%	460 out of 13517 genes, 3.4%	0.01784	function	ET VS T
protein tyrosine kinase activity	80 out of 2416 genes, 3.3%	294 out of 13517 genes, 2.2%	0.01884	function	ET VS T
calcium ion binding	108 out of 2416 genes, 4.5%	433 out of 13517 genes, 3.2%	0.05224	function	ET VS T
phosphorus metabolic process	260 out of 3382 genes, 7.7%	495 out of 8794 genes, 5.6%	3.3e-08	process	ET VS T
phosphate-containing compound metabolic process	260 out of 3382 genes, 7.7%	495 out of 8794 genes, 5.6%	3.3e-08	process	ET VS T
phosphorylation	212 out of 3382 genes, 6.3%	393 out of 8794 genes, 4.5%	1.03e-07	process	ET VS T
protein phosphorylation	200 out of 3382 genes, 5.9%	368 out of 8794 genes, 4.2%	1.5e-07	process	ET VS T
cellular component movement	64 out of 3382 genes, 1.9%	95 out of 8794 genes, 1.1%	6.84e-06	process	ET VS T
microtubule-based movement	63 out of 3382 genes, 1.9%	94 out of 8794 genes, 1.1%	1.21e-05	process	ET VS T
microtubule-based process	76 out of 3382 genes, 2.2%	123 out of 8794 genes, 1.4%	8.47e-05	process	ET VS T
protein metabolic process	659 out of 3382 genes, 19.5%	1488 out of 8794 genes, 16.9%	0.00019	process	ET VS T
intracellular signal transduction	193 out of 3382 genes, 5.7%	382 out of 8794 genes, 4.3%	0.00047	process	ET VS T
regulation of Rho protein signal transduction	29 out of 3382 genes, 0.9%	37 out of 8794 genes, 0.4%	0.0006	process	ET VS T
regulation of signal transduction	68 out of 3382 genes, 2.0%	113 out of 8794 genes, 1.3%	0.00154	process	ET VS T
regulation of signaling	68 out of 3382 genes, 2.0%	113 out of 8794 genes, 1.3%	0.00154	process	ET VS T
regulation of response to stimulus	68 out of 3382 genes, 2.0%	113 out of 8794 genes, 1.3%	0.00154	process	ET VS T
protein modification process	354 out of 3382 genes, 10.5%	767 out of 8794 genes, 8.7%	0.0024	process	ET VS T
nucleoside monophosphate metabolic process	41 out of 3382 genes, 1.2%	62 out of 8794 genes, 0.7%	0.00651	process	ET VS T
regulation of Ras protein signal transduction	49 out of 3382 genes, 1.4%	78 out of 8794 genes, 0.9%	0.00775	process	ET VS T
macromolecule modification	363 out of 3382 genes, 10.7%	797 out of 8794 genes, 9.1%	0.00817	process	ET VS T
regulation of small GTPase mediated signal transduction	58 out of 3382 genes, 1.7%	97 out of 8794 genes, 1.1%	0.01128	process	ET VS T
cyclic nucleotide metabolic process	34 out of 3382 genes, 1.0%	50 out of 8794 genes, 0.6%	0.01555	process	ET VS T
nucleoside monophosphate biosynthetic process	39 out of 3382 genes, 1.2%	60 out of 8794 genes, 0.7%	0.01969	process	ET VS T
cyclic nucleotide biosynthetic process	33 out of 3382 genes, 1.0%	49 out of 8794 genes, 0.6%	0.02791	process	ET VS T
regulation of phosphate metabolic process	18 out of 3382 genes, 0.5%	22 out of 8794 genes, 0.3%	0.0292	process	ET VS T
regulation of phosphorus metabolic process	18 out of 3382 genes, 0.5%	22 out of 8794 genes, 0.3%	0.0292	process	ET VS T
proteolysis	226 out of 3382 genes, 6.7%	481 out of 8794 genes, 5.5%	0.04017	process	ET VS T
macromolecular complex	159 out of 1084 genes, 14.7%	571 out of 6527 genes, 8.7%	1.3e-10	component	T VS D
ribosome	39 out of 1084 genes, 3.6%	81 out of 6527 genes, 1.2%	4.53e-09	component	T VS D
ribonucleoprotein complex	45 out of 1084 genes, 4.2%	106 out of 6527 genes, 1.6%	2.85e-08	component	T VS D
organelle	232 out of 1084 genes, 21.4%	1021 out of 6527 genes, 15.6%	2.76e-06	component	T VS D
intracellular organelle	232 out of 1084 genes, 21.4%	1021 out of 6527 genes, 15.6%	2.76e-06	component	T VS D
non-membrane-bounded organelle	91 out of 1084 genes, 8.4%	327 out of 6527 genes, 5.0%	1.54e-05	component	T VS D
intracellular non-membrane-bounded organelle	91 out of 1084 genes, 8.4%	327 out of 6527 genes, 5.0%	1.54e-05	component	T VS D
cytoplasmic part	87 out of 1084 genes, 8.0%	332 out of 6527 genes, 5.1%	0.00048	component	T VS D
protein complex	103 out of 1084 genes, 9.5%	427 out of 6527 genes, 6.5%	0.00322	component	T VS D
cytoplasm	116 out of 1084 genes, 10.7%	499 out of 6527 genes, 7.6%	0.00574	component	T VS D
structural constituent of ribosome	39 out of 2040 genes, 1.9%	81 out of 13517 genes, 0.6%	7.83e-10	function	T VS D
gated channel activity	110 out of 2040 genes, 5.4%	411 out of 13517 genes, 3.0%	1.56e-07	function	T VS D
structural molecule activity	48 out of 2040 genes, 2.4%	129 out of 13517 genes, 1.0%	2.05e-07	function	T VS D
channel activity	124 out of 2040 genes, 6.1%	502 out of 13517 genes, 3.7%	2.65e-06	function	T VS D
passive transmembrane transporter activity	124 out of 2040 genes, 6.1%	502 out of 13517 genes, 3.7%	2.65e-06	function	T VS D
ion channel activity	123 out of 2040 genes, 6.0%	500 out of 13517 genes, 3.7%	3.96e-06	function	T VS D
substrate-specific channel activity	123 out of 2040 genes, 6.0%	500 out of 13517 genes, 3.7%	3.96e-06	function	T VS D
calcium ion binding	107 out of 2040 genes, 5.2%	433 out of 13517 genes, 3.2%	2.87e-05	function	T VS D
ligand-gated ion channel activity	77 out of 2040 genes, 3.8%	285 out of 13517 genes, 2.1%	4.46e-05	function	T VS D
ligand-gated channel activity	77 out of 2040 genes, 3.8%	285 out of 13517 genes, 2.1%	4.46e-05	function	T VS D
cation channel activity	54 out of 2040 genes, 2.6%	186 out of 13517 genes, 1.4%	0.00031	function	T VS D
extracellular ligand-gated ion channel activity	73 out of 2040 genes, 3.6%	279 out of 13517 genes, 2.1%	0.00036	function	T VS D
ion transmembrane transporter activity	154 out of 2040 genes, 7.5%	720 out of 13517 genes, 5.3%	0.00088	function	T VS D
substrate-specific transmembrane transporter activity	157 out of 2040 genes, 7.7%	739 out of 13517 genes, 5.5%	0.00105	function	T VS D
substrate-specific transporter activity	164 out of 2040 genes, 8.0%	780 out of 13517 genes, 5.8%	0.0012	function	T VS D
transmembrane transporter activity	169 out of 2040 genes, 8.3%	828 out of 13517 genes, 6.1%	0.00524	function	T VS D
voltage-gated cation channel activity	32 out of 2040 genes, 1.6%	108 out of 13517 genes, 0.8%	0.03449	function	T VS D
translation	51 out of 1398 genes, 3.6%	147 out of 8794 genes, 1.7%	7.15e-06	process	T VS D
gene expression	83 out of 1398 genes, 5.9%	311 out of 8794 genes, 3.5%	0.00027	process	T VS D
macromolecule localization	74 out of 1398 genes, 5.3%	272 out of 8794 genes, 3.1%	0.00051	process	T VS D
protein transport	66 out of 1398 genes, 4.7%	236 out of 8794 genes, 2.7%	0.00069	process	T VS D
establishment of protein localization	66 out of 1398 genes, 4.7%	236 out of 8794 genes, 2.7%	0.00069	process	T VS D
protein localization	67 out of 1398 genes, 4.8%	248 out of 8794 genes, 2.8%	0.00217	process	T VS D
small GTPase mediated signal transduction	50 out of 1398 genes, 3.6%	172 out of 8794 genes, 2.0%	0.00413	process	T VS D
intracellular transport	47 out of 1398 genes, 3.4%	162 out of 8794 genes, 1.8%	0.00812	process	T VS D
ion transport	138 out of 1398 genes, 9.9%	626 out of 8794 genes, 7.1%	0.00887	process	T VS D
monovalent inorganic cation transport	51 out of 1398 genes, 3.6%	188 out of 8794 genes, 2.1%	0.02664	process	T VS D
metal ion transport	59 out of 1398 genes, 4.2%	227 out of 8794 genes, 2.6%	0.02768	process	T VS D
cellular protein metabolic process	215 out of 1398 genes, 15.4%	1074 out of 8794 genes, 12.2%	0.03728	process	T VS D
heterocycle catabolic process	36 out of 1398 genes, 2.6%	121 out of 8794 genes, 1.4%	0.04418	process	T VS D
nucleus	135 out of 1072 genes, 12.6%	543 out of 6527 genes, 8.3%	1.05e-05	component	EU VS EL
envelope	28 out of 1072 genes, 2.6%	67 out of 6527 genes, 1.0%	7.73e-05	component	EU VS EL
membrane-bounded organelle	168 out of 1072 genes, 15.7%	749 out of 6527 genes, 11.5%	0.00038	component	EU VS EL
intracellular membrane-bounded organelle	168 out of 1072 genes, 15.7%	749 out of 6527 genes, 11.5%	0.00038	component	EU VS EL
proteasome complex	9 out of 1072 genes, 0.8%	14 out of 6527 genes, 0.2%	0.0089	component	EU VS EL
proteasome core complex	8 out of 1072 genes, 0.7%	12 out of 6527 genes, 0.2%	0.01592	component	EU VS EL
outer membrane-bounded periplasmic space	15 out of 1072 genes, 1.4%	35 out of 6527 genes, 0.5%	0.0223	component	EU VS EL
cell envelope	15 out of 1072 genes, 1.4%	35 out of 6527 genes, 0.5%	0.0223	component	EU VS EL
periplasmic space	15 out of 1072 genes, 1.4%	35 out of 6527 genes, 0.5%	0.0223	component	EU VS EL
external encapsulating structure part	15 out of 1072 genes, 1.4%	35 out of 6527 genes, 0.5%	0.0223	component	EU VS EL
external encapsulating structure	15 out of 1072 genes, 1.4%	36 out of 6527 genes, 0.6%	0.03249	component	EU VS EL
sequence-specific DNA binding	88 out of 2165 genes, 4.1%	300 out of 13517 genes, 2.2%	1.51e-06	function	EU VS EL
nucleic acid binding transcription factor activity	100 out of 2165 genes, 4.6%	367 out of 13517 genes, 2.7%	9.37e-06	function	EU VS EL
sequence-specific DNA binding transcription factor activity	100 out of 2165 genes, 4.6%	367 out of 13517 genes, 2.7%	9.37e-06	function	EU VS EL
endopeptidase activity	90 out of 2165 genes, 4.2%	346 out of 13517 genes, 2.6%	0.00044	function	EU VS EL
receptor activity	114 out of 2165 genes, 5.3%	467 out of 13517 genes, 3.5%	0.00054	function	EU VS EL
peptidase activity, acting on L-amino acid peptides	111 out of 2165 genes, 5.1%	460 out of 13517 genes, 3.4%	0.00134	function	EU VS EL
signaling receptor activity	96 out of 2165 genes, 4.4%	391 out of 13517 genes, 2.9%	0.00289	function	EU VS EL
peptidase activity	112 out of 2165 genes, 5.2%	476 out of 13517 genes, 3.5%	0.0042	function	EU VS EL
steroid hormone receptor activity	20 out of 2165 genes, 0.9%	47 out of 13517 genes, 0.3%	0.00599	function	EU VS EL
phosphorus-oxygen lyase activity	20 out of 2165 genes, 0.9%	49 out of 13517 genes, 0.4%	0.01255	function	EU VS EL
serine-type endopeptidase activity	27 out of 2165 genes, 1.2%	77 out of 13517 genes, 0.6%	0.0147	function	EU VS EL
signal transducer activity	102 out of 2165 genes, 4.7%	438 out of 13517 genes, 3.2%	0.01628	function	EU VS EL
molecular transducer activity	102 out of 2165 genes, 4.7%	438 out of 13517 genes, 3.2%	0.01628	function	EU VS EL
oxidoreductase activity	192 out of 2165 genes, 8.9%	922 out of 13517 genes, 6.8%	0.01702	function	EU VS EL
serine-type peptidase activity	31 out of 2165 genes, 1.4%	97 out of 13517 genes, 0.7%	0.03124	function	EU VS EL
serine hydrolase activity	31 out of 2165 genes, 1.4%	97 out of 13517 genes, 0.7%	0.03124	function	EU VS EL
carbohydrate binding	28 out of 2165 genes, 1.3%	86 out of 13517 genes, 0.6%	0.04789	function	EU VS EL
DNA-dependent DNA replication	11 out of 1558 genes, 0.7%	16 out of 8794 genes, 0.2%	0.00515	process	EU VS EL
small molecule metabolic process	130 out of 1558 genes, 8.3%	534 out of 8794 genes, 6.1%	0.0227	process	EU VS EL
response to endogenous stimulus	20 out of 1558 genes, 1.3%	47 out of 8794 genes, 0.5%	0.03299	process	EU VS EL
response to hormone stimulus	20 out of 1558 genes, 1.3%	47 out of 8794 genes, 0.5%	0.03299	process	EU VS EL
hormone-mediated signaling pathway	20 out of 1558 genes, 1.3%	47 out of 8794 genes, 0.5%	0.03299	process	EU VS EL
response to organic substance	20 out of 1558 genes, 1.3%	47 out of 8794 genes, 0.5%	0.03299	process	EU VS EL
cellular response to hormone stimulus	20 out of 1558 genes, 1.3%	47 out of 8794 genes, 0.5%	0.03299	process	EU VS EL
steroid hormone mediated signaling pathway	20 out of 1558 genes, 1.3%	47 out of 8794 genes, 0.5%	0.03299	process	EU VS EL
response to steroid hormone stimulus	20 out of 1558 genes, 1.3%	47 out of 8794 genes, 0.5%	0.03299	process	EU VS EL
cellular response to chemical stimulus	20 out of 1558 genes, 1.3%	47 out of 8794 genes, 0.5%	0.03299	process	EU VS EL
cellular response to organic substance	20 out of 1558 genes, 1.3%	47 out of 8794 genes, 0.5%	0.03299	process	EU VS EL
cellular response to steroid hormone stimulus	20 out of 1558 genes, 1.3%	47 out of 8794 genes, 0.5%	0.03299	process	EU VS EL
cellular response to endogenous stimulus	20 out of 1558 genes, 1.3%	47 out of 8794 genes, 0.5%	0.03299	process	EU VS EL
membrane	918 out of 1443 genes, 63.6%	3484 out of 6527 genes, 53.4%	4.32e-17	component	EL VS S
extracellular region	99 out of 1443 genes, 6.9%	250 out of 6527 genes, 3.8%	1.62e-08	component	EL VS S
postsynaptic membrane	58 out of 1443 genes, 4.0%	133 out of 6527 genes, 2.0%	2.05e-06	component	EL VS S
synaptic membrane	58 out of 1443 genes, 4.0%	133 out of 6527 genes, 2.0%	2.05e-06	component	EL VS S
synapse part	59 out of 1443 genes, 4.1%	143 out of 6527 genes, 2.2%	1.71e-05	component	EL VS S
synapse	59 out of 1443 genes, 4.1%	143 out of 6527 genes, 2.2%	1.71e-05	component	EL VS S
integral to membrane	547 out of 1443 genes, 37.9%	2125 out of 6527 genes, 32.6%	6.91e-05	component	EL VS S
intrinsic to membrane	565 out of 1443 genes, 39.2%	2205 out of 6527 genes, 33.8%	7.7e-05	component	EL VS S
extracellular matrix	20 out of 1443 genes, 1.4%	34 out of 6527 genes, 0.5%	0.0004	component	EL VS S
proteasome core complex	10 out of 1443 genes, 0.7%	12 out of 6527 genes, 0.2%	0.00123	component	EL VS S
gap junction	14 out of 1443 genes, 1.0%	21 out of 6527 genes, 0.3%	0.00159	component	EL VS S
membrane part	570 out of 1443 genes, 39.5%	2285 out of 6527 genes, 35.0%	0.0034	component	EL VS S
proteasome complex	10 out of 1443 genes, 0.7%	14 out of 6527 genes, 0.2%	0.01198	component	EL VS S
cell-cell junction	14 out of 1443 genes, 1.0%	25 out of 6527 genes, 0.4%	0.02471	component	EL VS S
virion	11 out of 1443 genes, 0.8%	18 out of 6527 genes, 0.3%	0.04259	component	EL VS S
viral capsid	11 out of 1443 genes, 0.8%	18 out of 6527 genes, 0.3%	0.04259	component	EL VS S
virion part	11 out of 1443 genes, 0.8%	18 out of 6527 genes, 0.3%	0.04259	component	EL VS S
cell junction	15 out of 1443 genes, 1.0%	29 out of 6527 genes, 0.4%	0.04714	component	EL VS S
ion channel activity	194 out of 2819 genes, 6.9%	500 out of 13517 genes, 3.7%	2.9e-18	function	EL VS S
substrate-specific channel activity	194 out of 2819 genes, 6.9%	500 out of 13517 genes, 3.7%	2.9e-18	function	EL VS S
channel activity	194 out of 2819 genes, 6.9%	502 out of 13517 genes, 3.7%	4.94e-18	function	EL VS S
passive transmembrane transporter activity	194 out of 2819 genes, 6.9%	502 out of 13517 genes, 3.7%	4.94e-18	function	EL VS S
ligand-gated ion channel activity	122 out of 2819 genes, 4.3%	285 out of 13517 genes, 2.1%	9.82e-15	function	EL VS S
ligand-gated channel activity	122 out of 2819 genes, 4.3%	285 out of 13517 genes, 2.1%	9.82e-15	function	EL VS S
transmembrane transporter activity	271 out of 2819 genes, 9.6%	828 out of 13517 genes, 6.1%	4.94e-14	function	EL VS S
extracellular ligand-gated ion channel activity	118 out of 2819 genes, 4.2%	279 out of 13517 genes, 2.1%	9.92e-14	function	EL VS S
transporter activity	329 out of 2819 genes, 11.7%	1066 out of 13517 genes, 7.9%	2.97e-13	function	EL VS S
ion transmembrane transporter activity	240 out of 2819 genes, 8.5%	720 out of 13517 genes, 5.3%	3.09e-13	function	EL VS S
gated channel activity	155 out of 2819 genes, 5.5%	411 out of 13517 genes, 3.0%	5.53e-13	function	EL VS S
calcium ion binding	161 out of 2819 genes, 5.7%	433 out of 13517 genes, 3.2%	6.74e-13	function	EL VS S
substrate-specific transmembrane transporter activity	242 out of 2819 genes, 8.6%	739 out of 13517 genes, 5.5%	2.33e-12	function	EL VS S
oxidoreductase activity	288 out of 2819 genes, 10.2%	922 out of 13517 genes, 6.8%	4.59e-12	function	EL VS S
substrate-specific transporter activity	248 out of 2819 genes, 8.8%	780 out of 13517 genes, 5.8%	4.51e-11	function	EL VS S
copper ion binding	41 out of 2819 genes, 1.5%	67 out of 13517 genes, 0.5%	3.22e-10	function	EL VS S
chitin binding	39 out of 2819 genes, 1.4%	63 out of 13517 genes, 0.5%	6.91e-10	function	EL VS S
pattern binding	44 out of 2819 genes, 1.6%	79 out of 13517 genes, 0.6%	4.48e-09	function	EL VS S
polysaccharide binding	44 out of 2819 genes, 1.6%	79 out of 13517 genes, 0.6%	4.48e-09	function	EL VS S
receptor activity	159 out of 2819 genes, 5.6%	467 out of 13517 genes, 3.5%	4.73e-09	function	EL VS S
carbohydrate binding	46 out of 2819 genes, 1.6%	86 out of 13517 genes, 0.6%	1.02e-08	function	EL VS S
signaling receptor activity	136 out of 2819 genes, 4.8%	391 out of 13517 genes, 2.9%	2.89e-08	function	EL VS S
peroxidase activity	28 out of 2819 genes, 1.0%	45 out of 13517 genes, 0.3%	8.23e-07	function	EL VS S
oxidoreductase activity, acting on peroxide as acceptor	28 out of 2819 genes, 1.0%	45 out of 13517 genes, 0.3%	8.23e-07	function	EL VS S
signal transducer activity	142 out of 2819 genes, 5.0%	438 out of 13517 genes, 3.2%	2.56e-06	function	EL VS S
molecular transducer activity	142 out of 2819 genes, 5.0%	438 out of 13517 genes, 3.2%	2.56e-06	function	EL VS S
endopeptidase activity	116 out of 2819 genes, 4.1%	346 out of 13517 genes, 2.6%	8.11e-06	function	EL VS S
metalloendopeptidase activity	45 out of 2819 genes, 1.6%	99 out of 13517 genes, 0.7%	1.35e-05	function	EL VS S
heme binding	88 out of 2819 genes, 3.1%	249 out of 13517 genes, 1.8%	2.94e-05	function	EL VS S
transmembrane signaling receptor activity	111 out of 2819 genes, 3.9%	336 out of 13517 genes, 2.5%	3.94e-05	function	EL VS S
tetrapyrrole binding	89 out of 2819 genes, 3.2%	256 out of 13517 genes, 1.9%	5.85e-05	function	EL VS S
peptidase activity, acting on L-amino acid peptides	142 out of 2819 genes, 5.0%	460 out of 13517 genes, 3.4%	7.66e-05	function	EL VS S
peptidase activity	145 out of 2819 genes, 5.1%	476 out of 13517 genes, 3.5%	0.00013	function	EL VS S
sequence-specific DNA binding	99 out of 2819 genes, 3.5%	300 out of 13517 genes, 2.2%	0.0002	function	EL VS S
oxidoreductase activity, acting on paired donors, with incorporation or reduction of molecular oxygen	93 out of 2819 genes, 3.3%	278 out of 13517 genes, 2.1%	0.00022	function	EL VS S
antioxidant activity	28 out of 2819 genes, 1.0%	55 out of 13517 genes, 0.4%	0.00031	function	EL VS S
iron ion binding	103 out of 2819 genes, 3.7%	320 out of 13517 genes, 2.4%	0.00045	function	EL VS S
nucleic acid binding transcription factor activity	115 out of 2819 genes, 4.1%	367 out of 13517 genes, 2.7%	0.00049	function	EL VS S
sequence-specific DNA binding transcription factor activity	115 out of 2819 genes, 4.1%	367 out of 13517 genes, 2.7%	0.00049	function	EL VS S
G-protein coupled receptor activity	59 out of 2819 genes, 2.1%	160 out of 13517 genes, 1.2%	0.00086	function	EL VS S
oxidoreductase activity, acting on the CH-NH2 group of donors	15 out of 2819 genes, 0.5%	22 out of 13517 genes, 0.2%	0.00094	function	EL VS S
oxidoreductase activity, acting on the CH-NH2 group of donors, oxygen as acceptor	14 out of 2819 genes, 0.5%	20 out of 13517 genes, 0.1%	0.00128	function	EL VS S
serine-type endopeptidase activity	34 out of 2819 genes, 1.2%	77 out of 13517 genes, 0.6%	0.00142	function	EL VS S
sulfotransferase activity	56 out of 2819 genes, 2.0%	152 out of 13517 genes, 1.1%	0.00161	function	EL VS S
serine-type peptidase activity	40 out of 2819 genes, 1.4%	97 out of 13517 genes, 0.7%	0.00166	function	EL VS S
serine hydrolase activity	40 out of 2819 genes, 1.4%	97 out of 13517 genes, 0.7%	0.00166	function	EL VS S
metallopeptidase activity	57 out of 2819 genes, 2.0%	157 out of 13517 genes, 1.2%	0.00223	function	EL VS S
flavin adenine dinucleotide binding	35 out of 2819 genes, 1.2%	82 out of 13517 genes, 0.6%	0.00262	function	EL VS S
threonine-type endopeptidase activity	10 out of 2819 genes, 0.4%	12 out of 13517 genes, 0.1%	0.0028	function	EL VS S
threonine-type peptidase activity	10 out of 2819 genes, 0.4%	12 out of 13517 genes, 0.1%	0.0028	function	EL VS S
transferase activity, transferring sulfur-containing groups	56 out of 2819 genes, 2.0%	155 out of 13517 genes, 1.1%	0.00319	function	EL VS S
oxidoreductase activity, acting on paired donors, with incorporation or reduction of molecular oxygen, reduced ascorbate as one donor, and incorporation of one atom of oxygen	16 out of 2819 genes, 0.6%	27 out of 13517 genes, 0.2%	0.00627	function	EL VS S
steroid hormone receptor activity	23 out of 2819 genes, 0.8%	47 out of 13517 genes, 0.3%	0.00703	function	EL VS S
neuropeptide receptor activity	19 out of 2819 genes, 0.7%	37 out of 13517 genes, 0.3%	0.01618	function	EL VS S
peptidase inhibitor activity	29 out of 2819 genes, 1.0%	68 out of 13517 genes, 0.5%	0.0163	function	EL VS S
peptidase regulator activity	29 out of 2819 genes, 1.0%	68 out of 13517 genes, 0.5%	0.0163	function	EL VS S
cation channel activity	62 out of 2819 genes, 2.2%	186 out of 13517 genes, 1.4%	0.01911	function	EL VS S
primary amine oxidase activity	11 out of 2819 genes, 0.4%	16 out of 13517 genes, 0.1%	0.02045	function	EL VS S
peptide receptor activity	21 out of 2819 genes, 0.7%	44 out of 13517 genes, 0.3%	0.02607	function	EL VS S
G-protein coupled peptide receptor activity	21 out of 2819 genes, 0.7%	44 out of 13517 genes, 0.3%	0.02607	function	EL VS S
chitin metabolic process	45 out of 2002 genes, 2.2%	75 out of 8794 genes, 0.9%	2.15e-09	process	EL VS S
aminoglycan metabolic process	49 out of 2002 genes, 2.4%	87 out of 8794 genes, 1.0%	6.29e-09	process	EL VS S
response to chemical stimulus	51 out of 2002 genes, 2.5%	95 out of 8794 genes, 1.1%	2.69e-08	process	EL VS S
polysaccharide metabolic process	50 out of 2002 genes, 2.5%	93 out of 8794 genes, 1.1%	3.88e-08	process	EL VS S
ion transport	207 out of 2002 genes, 10.3%	626 out of 8794 genes, 7.1%	3.25e-07	process	EL VS S
response to oxidative stress	28 out of 2002 genes, 1.4%	45 out of 8794 genes, 0.5%	8.35e-06	process	EL VS S
amine metabolic process	92 out of 2002 genes, 4.6%	247 out of 8794 genes, 2.8%	7.45e-05	process	EL VS S
oxidation-reduction process	221 out of 2002 genes, 11.0%	729 out of 8794 genes, 8.3%	0.00028	process	EL VS S
response to endogenous stimulus	23 out of 2002 genes, 1.1%	47 out of 8794 genes, 0.5%	0.04008	process	EL VS S
response to hormone stimulus	23 out of 2002 genes, 1.1%	47 out of 8794 genes, 0.5%	0.04008	process	EL VS S
hormone-mediated signaling pathway	23 out of 2002 genes, 1.1%	47 out of 8794 genes, 0.5%	0.04008	process	EL VS S
response to organic substance	23 out of 2002 genes, 1.1%	47 out of 8794 genes, 0.5%	0.04008	process	EL VS S
cellular response to hormone stimulus	23 out of 2002 genes, 1.1%	47 out of 8794 genes, 0.5%	0.04008	process	EL VS S
steroid hormone mediated signaling pathway	23 out of 2002 genes, 1.1%	47 out of 8794 genes, 0.5%	0.04008	process	EL VS S
response to steroid hormone stimulus	23 out of 2002 genes, 1.1%	47 out of 8794 genes, 0.5%	0.04008	process	EL VS S
cellular response to chemical stimulus	23 out of 2002 genes, 1.1%	47 out of 8794 genes, 0.5%	0.04008	process	EL VS S
cellular response to organic substance	23 out of 2002 genes, 1.1%	47 out of 8794 genes, 0.5%	0.04008	process	EL VS S
cellular response to steroid hormone stimulus	23 out of 2002 genes, 1.1%	47 out of 8794 genes, 0.5%	0.04008	process	EL VS S
cellular response to endogenous stimulus	23 out of 2002 genes, 1.1%	47 out of 8794 genes, 0.5%	0.04008	process	EL VS S
Note: early trochophore, ET; trochophore T; D-stage larvae, D; early umbo larvae, EU; eyed larvae, EL; spat, S.
